# Supplementary material
Source: publisher figshare collection journal article supplement (https://tandf.figshare.com/ndownloader/files/21102828)
Supplement: Supplementary file 1 [file 21102828]

Supporting information

**A smart ATP-responsive chemotherapy drug-free delivery system using a DNA nanostructure for synergistic treatment of breast cancer *in vitro* and *in vivo***

Khalil Abnousa,b,¥, Noor Mohammad Daneshc,¥, Mohammad Ramezania, Mona Alibolandia, Amirhossein Bahreynia,d,e, Parirokh Lavaeef, Seyedeh Alia Moosaviang, Seyed Mohammad Taghdisih,i,*

aPharmaceutical Research Center, Pharmaceutical Technology Institute, Mashhad University of Medical Sciences, Mashhad, Iran.

bDepartment of Medicinal Chemistry, School of Pharmacy, Mashhad University of Medical Sciences, Mashhad, Iran.

cResearch Institute of Sciences and New Technology, Mashhad, Iran.

dCentre for Heart Lung Innovation, St. Paul's Hospital, Vancouver, BC, Canada.

eDepartment of Pathology and Laboratory Medicine, University of British Columbia, Vancouver, BC, Canada.

fAcademic Center for Education, Culture and Research, Research Institute for Industrial Biotechnology, Industrial Biotechnology on Microorganisms, Mashhad, Iran.

gNanotechnology Research Center, Pharmaceutical Technology Institute, Mashhad University of Medical Sciences, Mashhad, Iran.

hTargeted Drug Delivery Research Center, Pharmaceutical Technology Institute, Mashhad University of Medical Sciences, Mashhad, Iran.

iDepartment of Pharmaceutical Biotechnology, School of Pharmacy, Mashhad University of Medical Sciences, Mashhad, Iran.

Short title: A smart ATP-responsive chemotherapy drug-free delivery system

¥  These authors contributed equally to the work.

* Corresponding author: Dr. Seyed Mohammad Taghdisi ([taghdisihm@mums.ac.ir](mailto:taghdisihm@mums.ac.ir)), Tel.: +98 513 1801203**,** Fax.: +98 513 882 3251


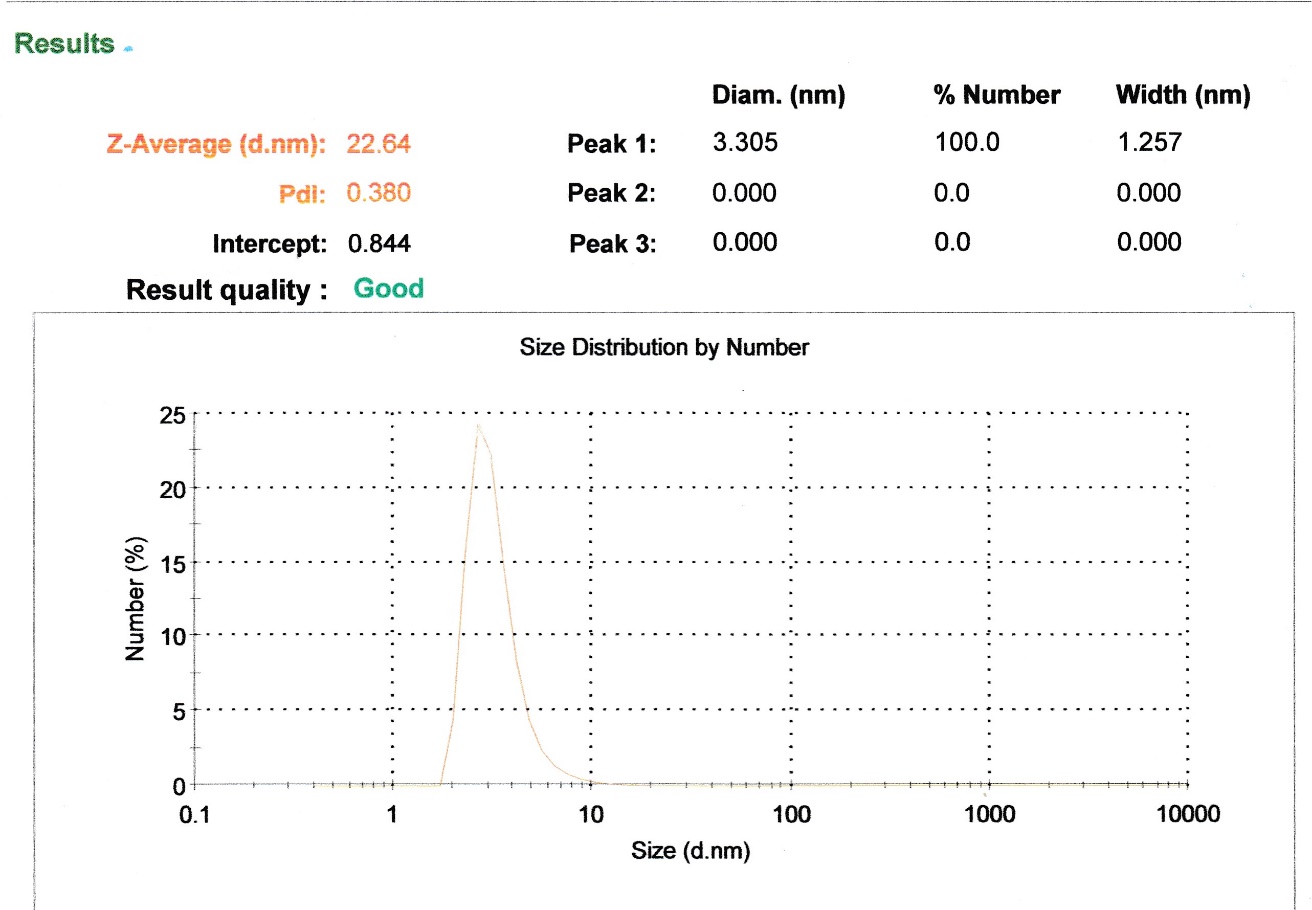

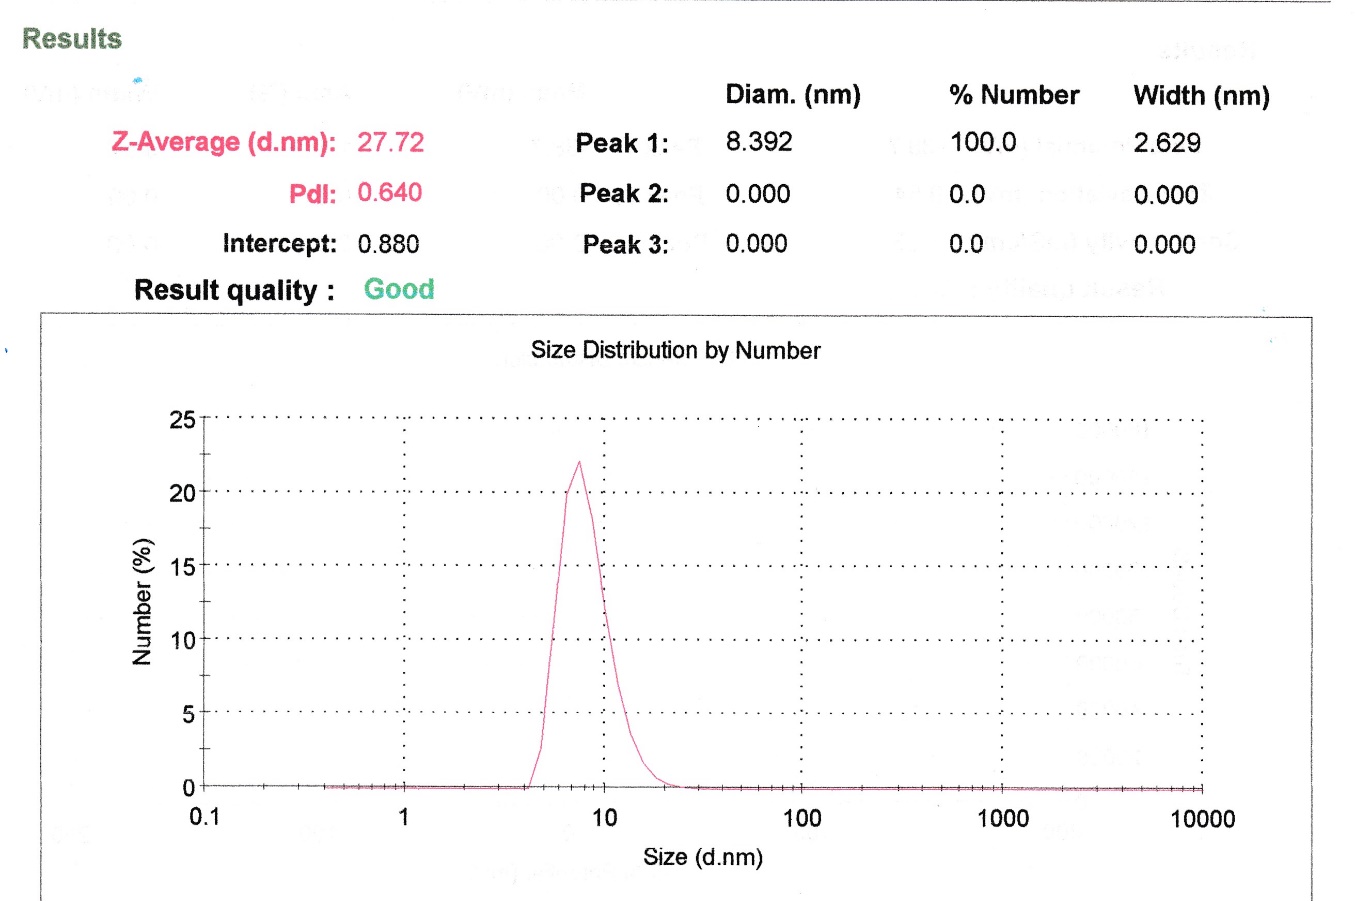


a)

b)


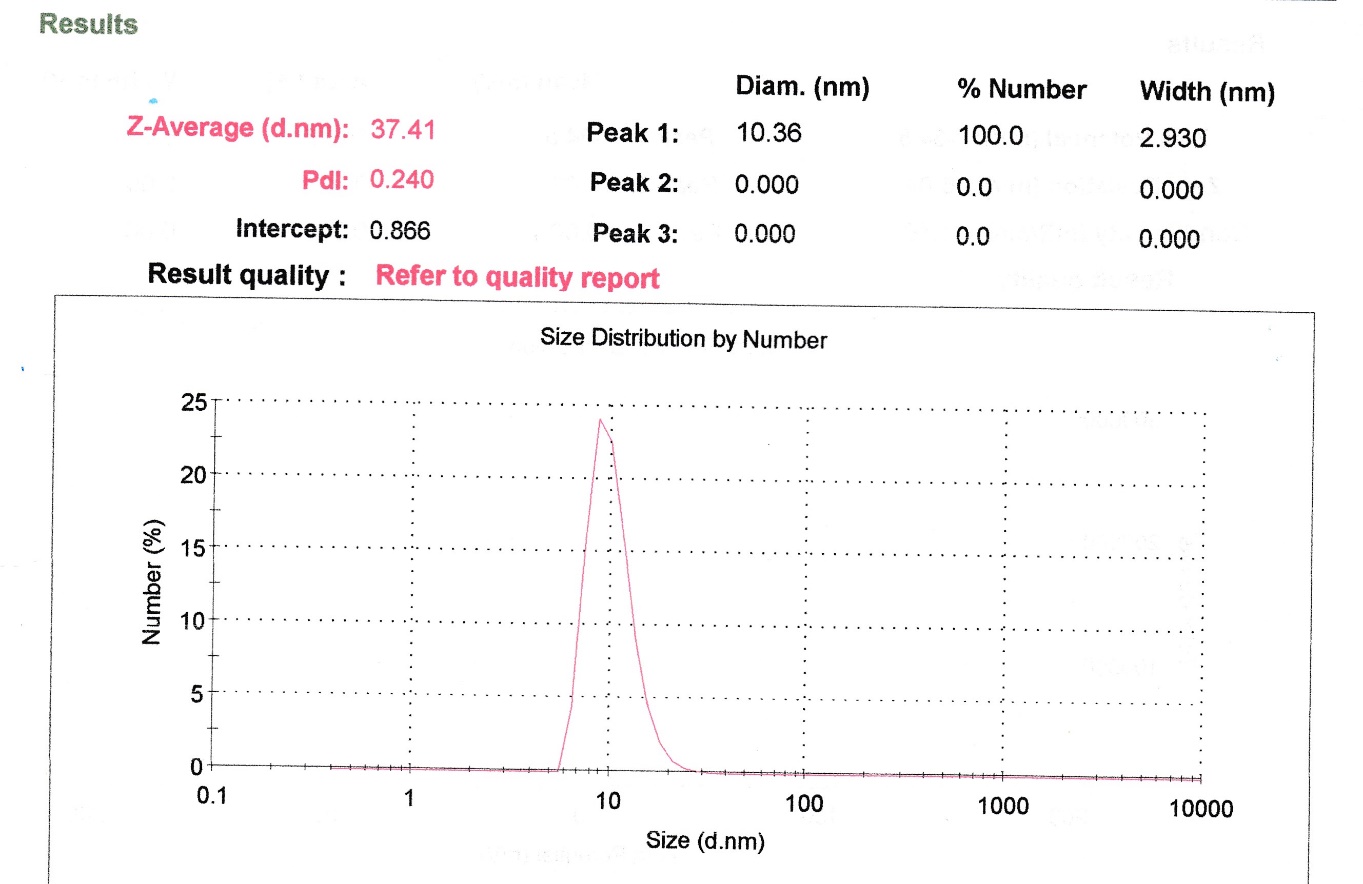


c)

Fig. S1. Evaluation of the assembly of the DNA nanostructure using DLS. (a) KLA-sequence 1, (b) PEG-sequence 2 (c) and DNA nanostructure.
